# Supplementary material for: Bellidifolin Ameliorates Isoprenaline-Induced Myocardial Fibrosis by Regulating TGF-β1/Smads and p38 Signaling and Preventing NR4A1 Cytoplasmic Localization
Source: PubMed Central journal article supplement (PMC8120298; doi:10.3389/fphar.2021.644886), 2021-04-30
Supplement: datasheet1.pdf [file datasheet1.pdf]

**Bellidifolin ameliorates myocardial fibrosis by regulating TGF- $\beta$ 1/Smads and p38 signaling to prevent NR4A1 cytoplasmic localization**

Hong-Xia Yang<sup>1,2,†</sup>, Jia-Huan Sun<sup>3,†</sup>, Ting-Ting Yao<sup>1,†</sup>, Yuan Li<sup>1,†</sup>, Geng-Rui Xu<sup>1</sup>, Chuang Zhang<sup>1</sup>, Xing-Chao Liu<sup>4</sup>, Wei-Wei Zhou<sup>1</sup>, Qiu-Hang Song<sup>1,4,5</sup>, Yue Zhang<sup>1,4,5,\*</sup>, Ai-Ying Li<sup>1,4,5,\*</sup>

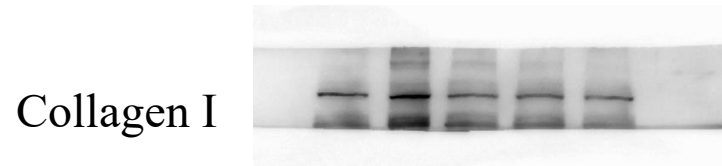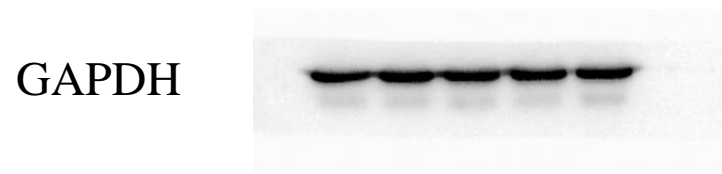

Control  
ISO  
BEL 25 mg/kg  
BEL 50 mg/kg  
TMZ 20 mg/kg

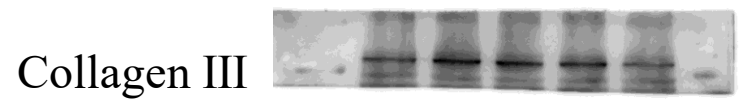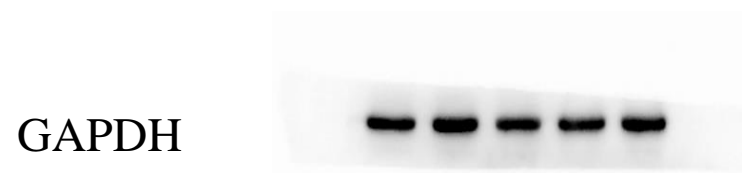

Control  
ISO  
BEL 25 mg/kg  
BEL 50 mg/kg  
TMZ 20 mg/kg

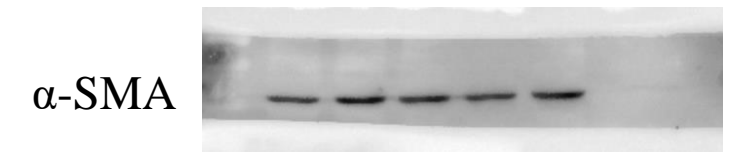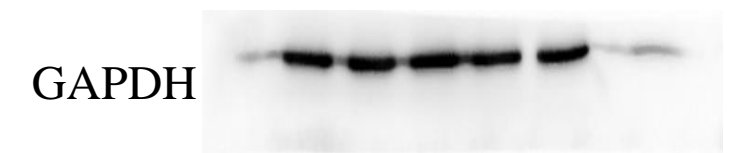

Control  
ISO  
BEL 25 mg/kg  
BEL 50 mg/kg  
TMZ 20 mg/kg

$\alpha$ -SMA

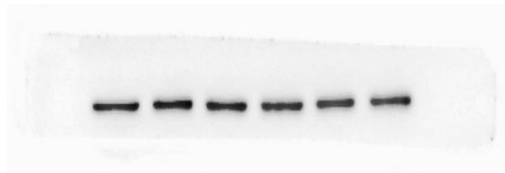

Collagen I

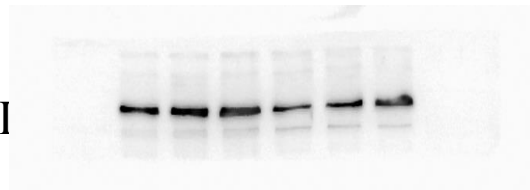

Collagen III

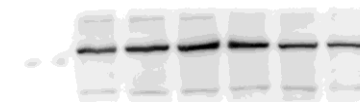

GAPDH

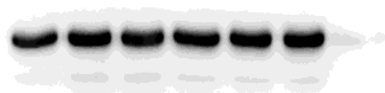

GAPDH

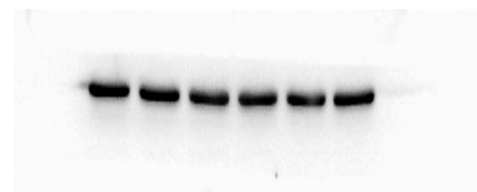

GAPDH

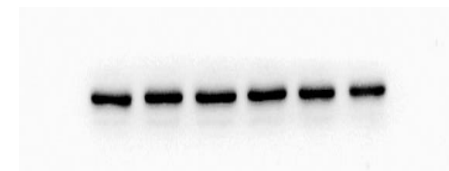

Control  
TGF- $\beta$ 1  
TGF- $\beta$ 1+DMSO  
BEL 15  $\mu$ M  
BEL 30  $\mu$ M  
BEL 60  $\mu$ M

Control  
TGF- $\beta$ 1  
TGF- $\beta$ 1+DMSO  
BEL 15  $\mu$ M  
BEL 30  $\mu$ M  
BEL 60  $\mu$ M

Control  
TGF- $\beta$ 1  
TGF- $\beta$ 1+DMSO  
BEL 15  $\mu$ M  
BEL 30  $\mu$ M  
BEL 60  $\mu$ M

P-T $\beta$ RI

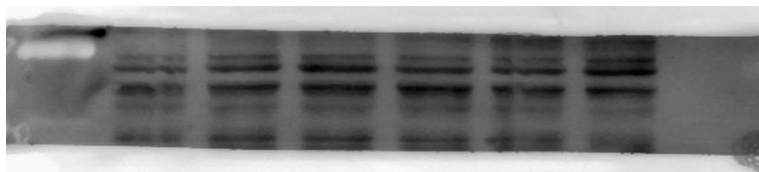

T $\beta$ RI

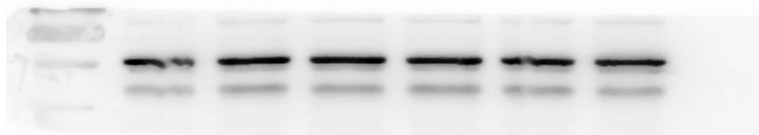

GAPDH

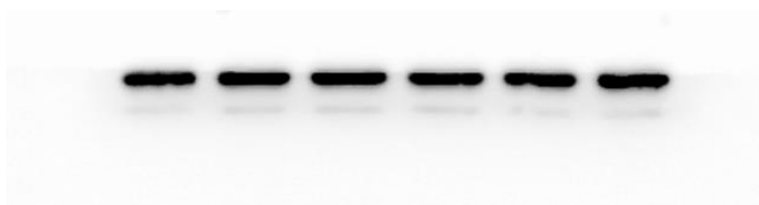

Control  
TGF- $\beta$ 1  
TGF- $\beta$ 1+DMSO  
BEL 15  $\mu$ M  
BEL 30  $\mu$ M  
BEL 60  $\mu$ M

P-T $\beta$ RII

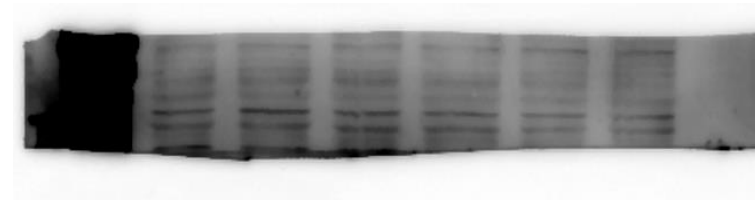

T $\beta$ RII

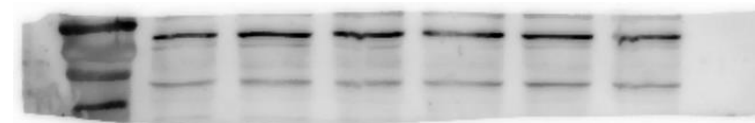

GAPDH

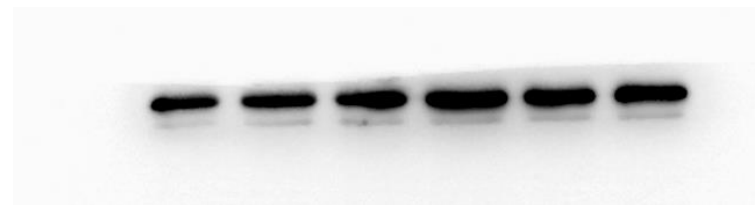

Control  
TGF- $\beta$ 1  
TGF- $\beta$ 1+DMSO  
BEL 15  $\mu$ M  
BEL 30  $\mu$ M  
BEL 60  $\mu$ M

P-T $\beta$ RI

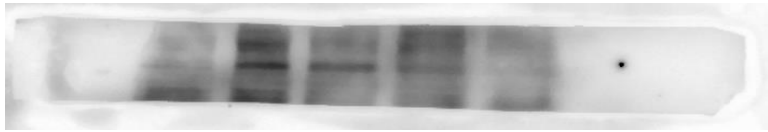

T $\beta$ RI

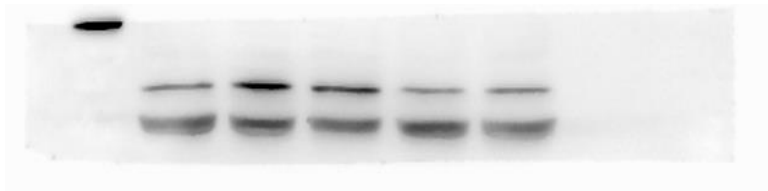

GAPDH

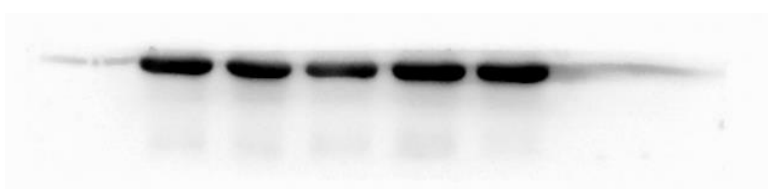

Control  
ISO  
BEL 25 mg/kg  
BEL 50 mg/kg  
TMZ 20 mg/kg

P-T $\beta$ RII

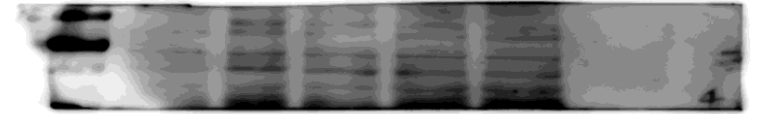

T $\beta$ RII

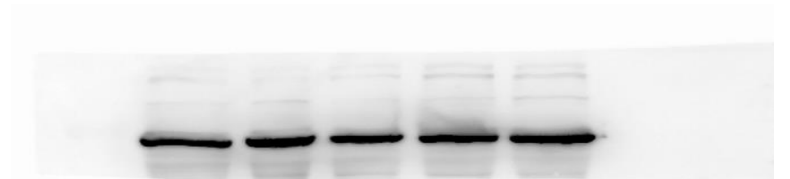

GAPDH

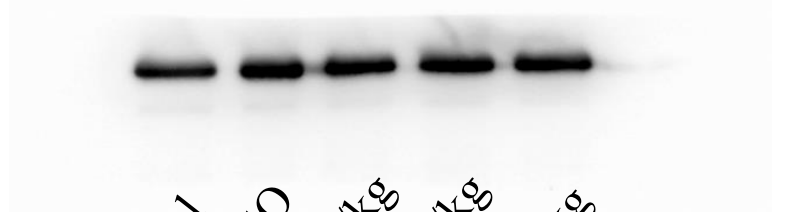

Control  
ISO  
BEL 25 mg/kg  
BEL 50 mg/kg  
TMZ 20 mg/kg

P-Smad2

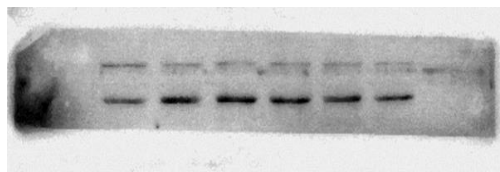

Smad2

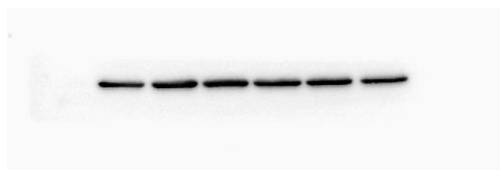

GAPDH

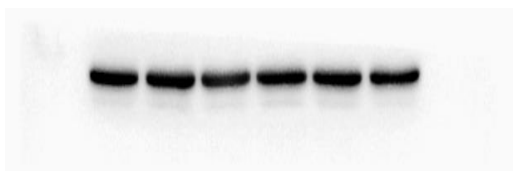

Control  
TGF- $\beta$ 1  
TGF- $\beta$ 1+DMSO  
BEL 15  $\mu$ M  
BEL 30  $\mu$ M  
BEL 60  $\mu$ M

P-Smad3

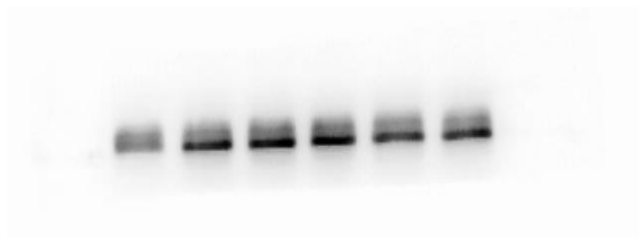

Smad3

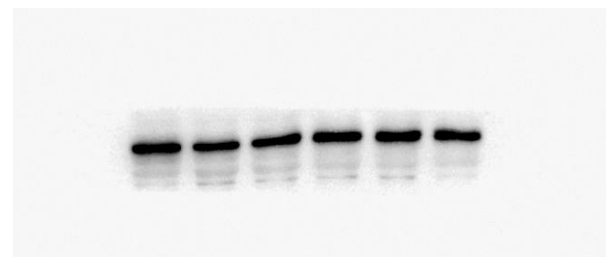

GAPDH

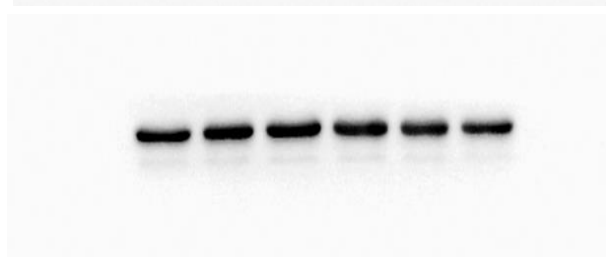

Control  
TGF- $\beta$ 1  
TGF- $\beta$ 1+DMSO  
BEL 15  $\mu$ M  
BEL 30  $\mu$ M  
BEL 60  $\mu$ M

Smad4

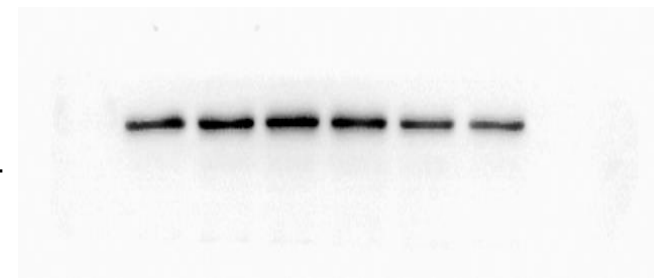

GAPDH

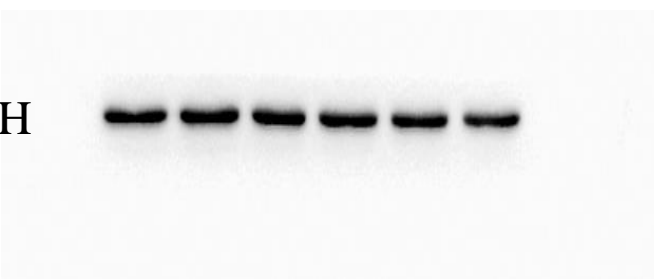

Control  
TGF- $\beta$ 1  
TGF- $\beta$ 1+DMSO  
BEL 15  $\mu$ M  
BEL 30  $\mu$ M  
BEL 60  $\mu$ M

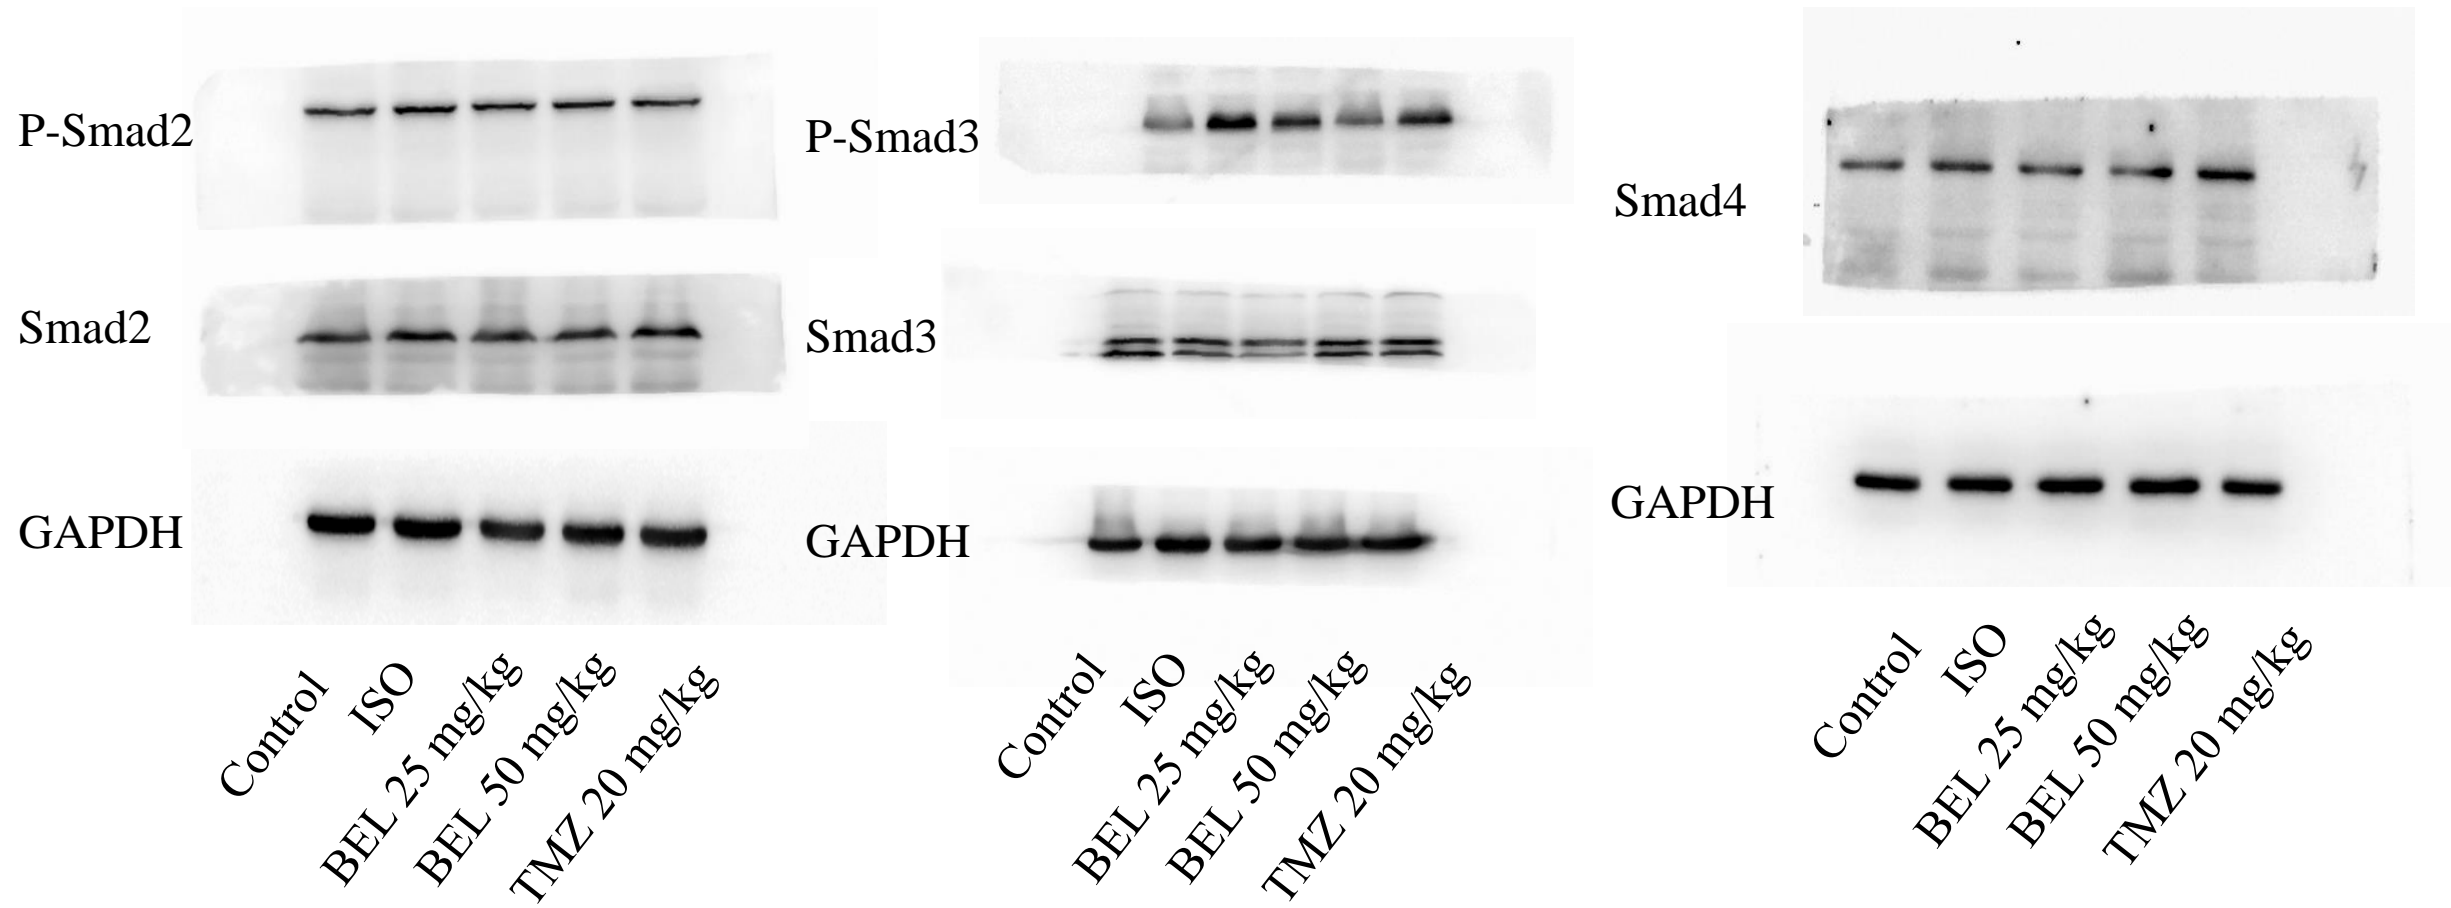

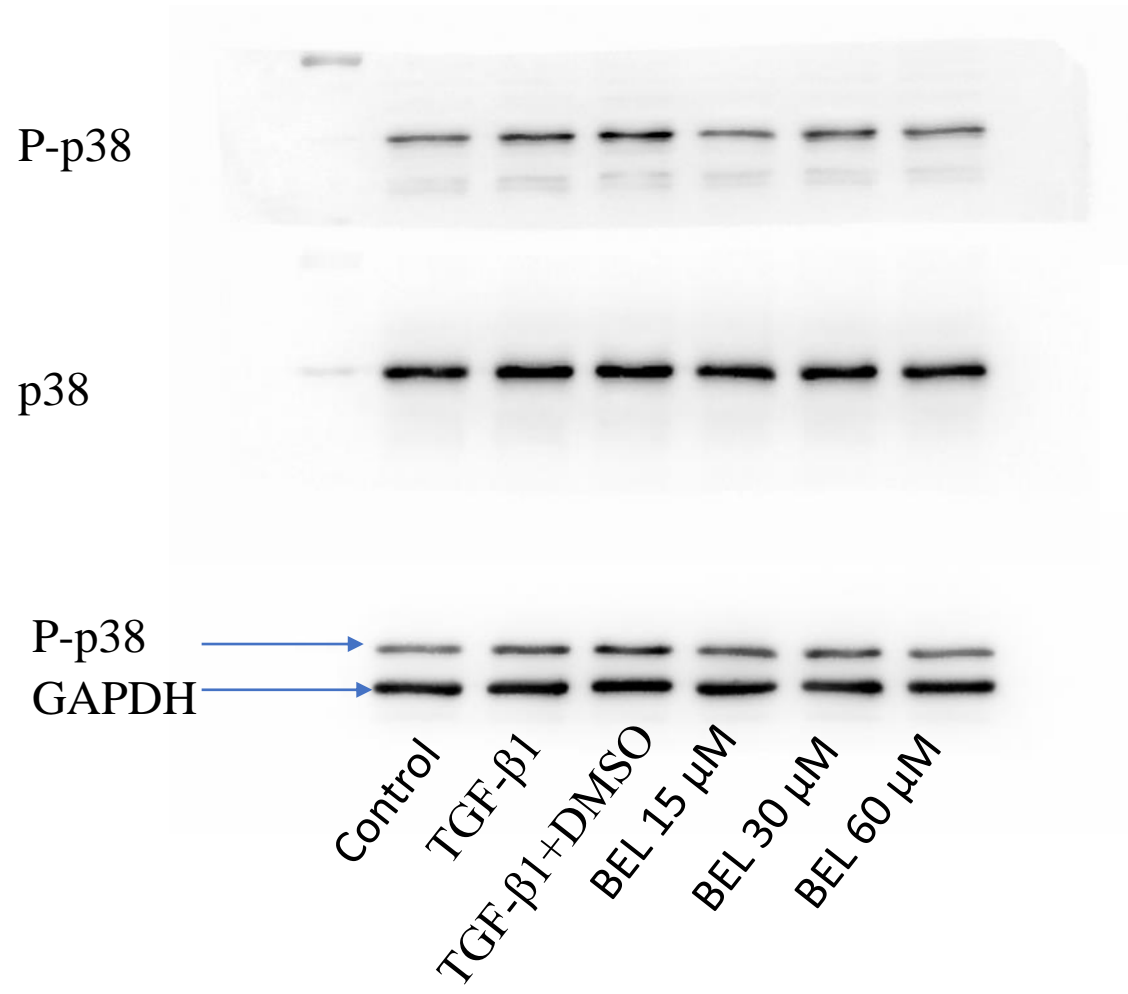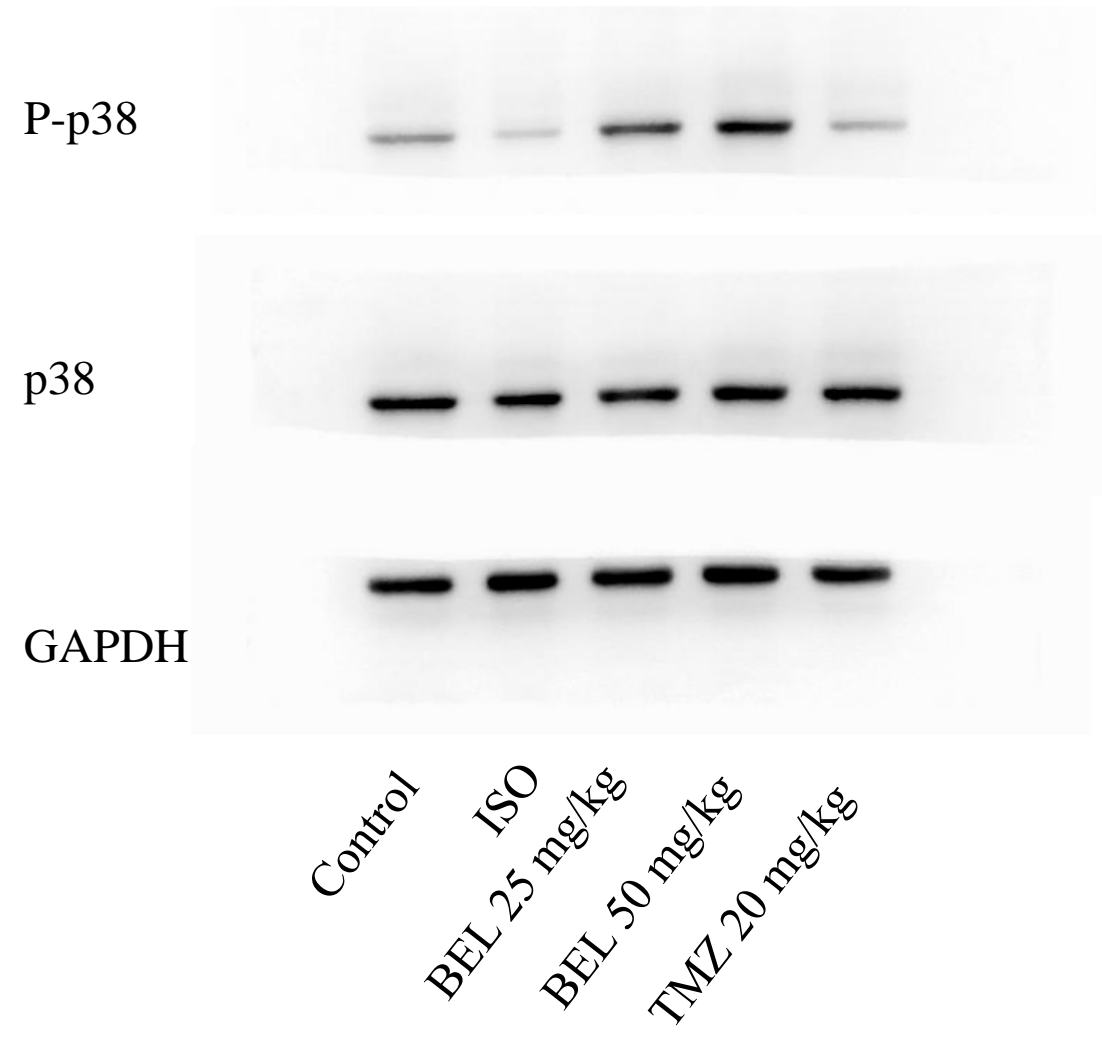



P-Smad3

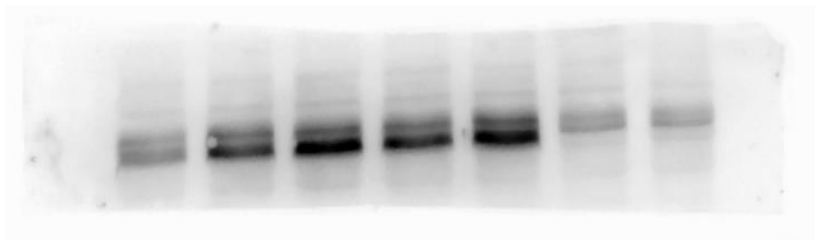

Smad3

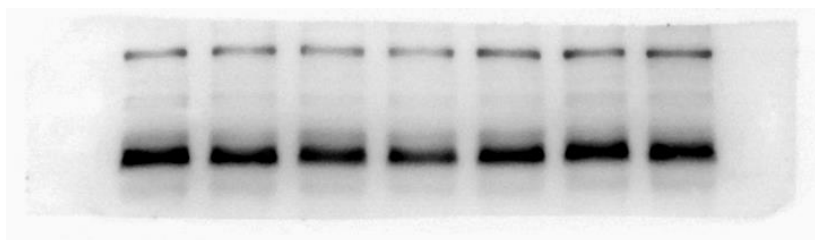

GAPDH

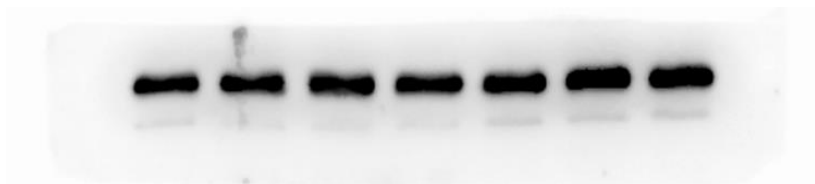

Control  
TGF- $\beta$ 1  
TGF- $\beta$ 1+DMSO  
BEL 60  $\mu$ M  
SB203580  
LY2157299  
SB203580+LY2157299

$\alpha$ -SMA

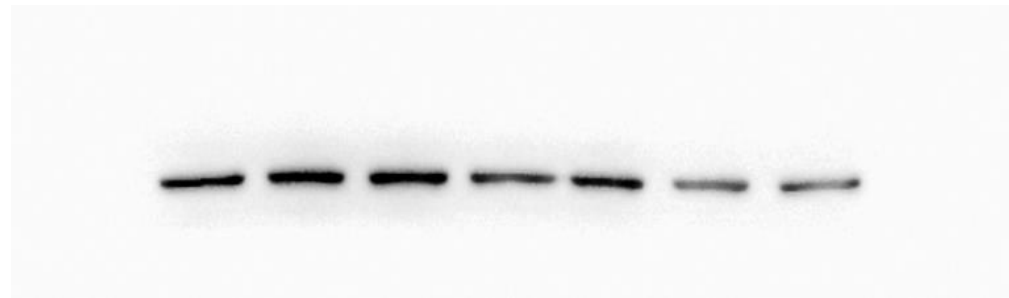

GAPDH

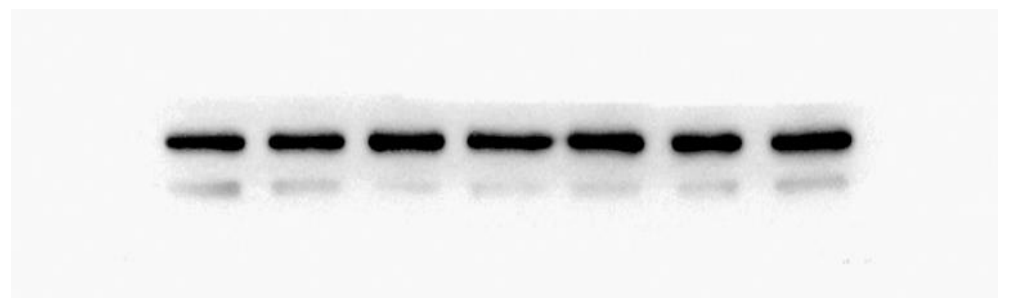

Control  
TGF- $\beta$ 1  
TGF- $\beta$ 1+DMSO  
BEL 60  $\mu$ M  
SB203580  
LY2157299  
SB203580+LY2157299

Collagen I

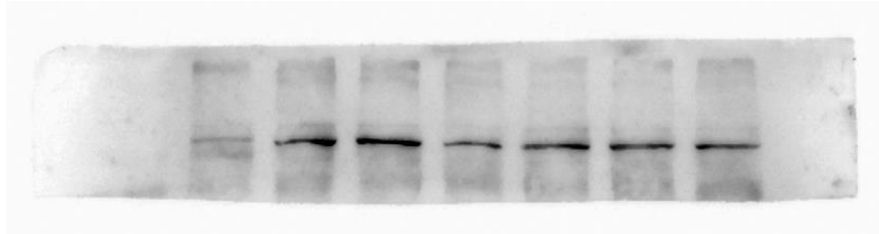

GAPDH

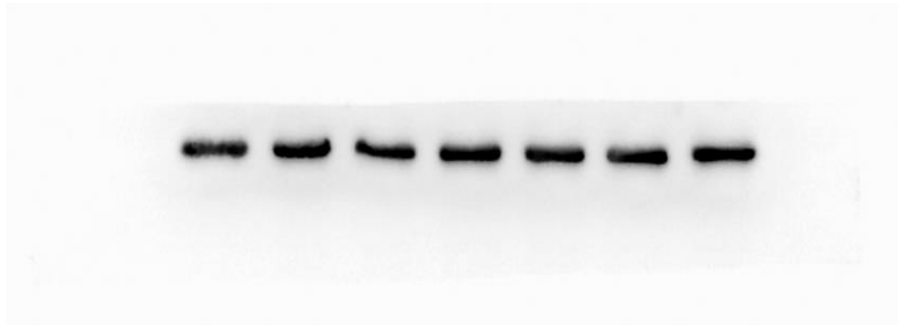

Control  
TGF- $\beta$ 1  
TGF- $\beta$ 1+DMSO  
BEL 60  $\mu$ M  
SB203580  
LY2157299  
SB203580+LY2157299

Collagen III

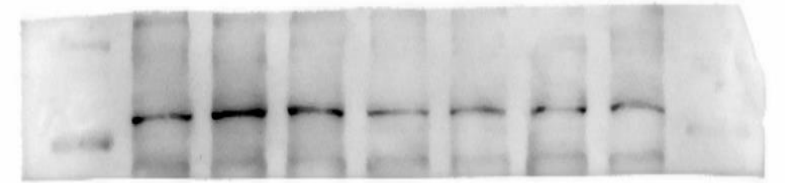

GAPDH

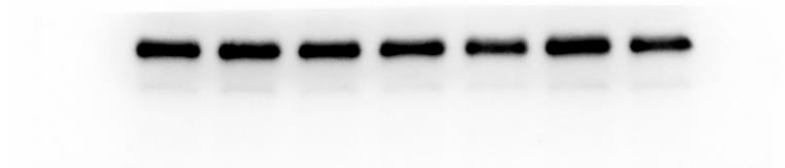

Control  
TGF- $\beta$ 1  
TGF- $\beta$ 1+DMSO  
BEL 60  $\mu$ M  
SB203580  
LY2157299  
SB203580+LY2157299

Total-P-NR4A1

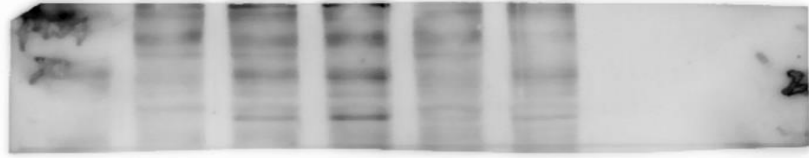

Total-NR4A1

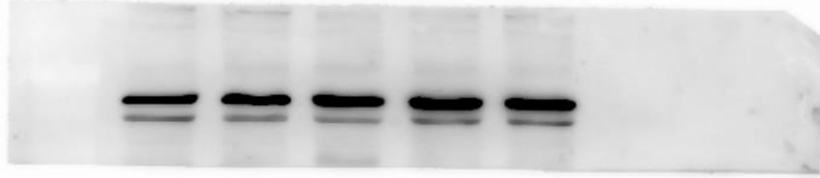

GAPDH

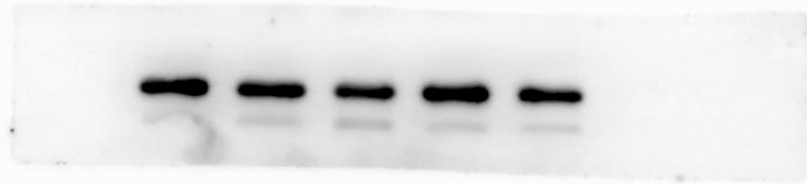

Control  
TGF- $\beta$ 1  
TGF- $\beta$ 1+DMSO  
BEL 60  $\mu$ M  
SB203580

Cytoplasm-P-NR4A1

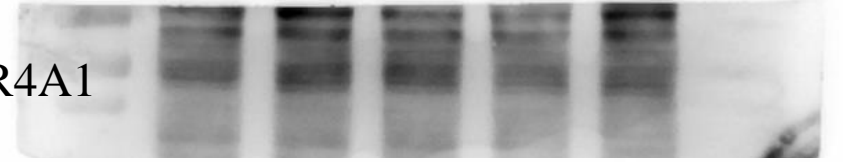

Cytoplasm-NR4A1

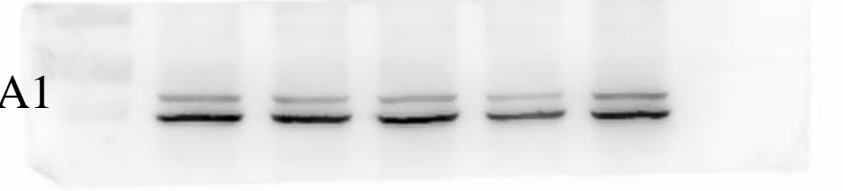

GAPDH

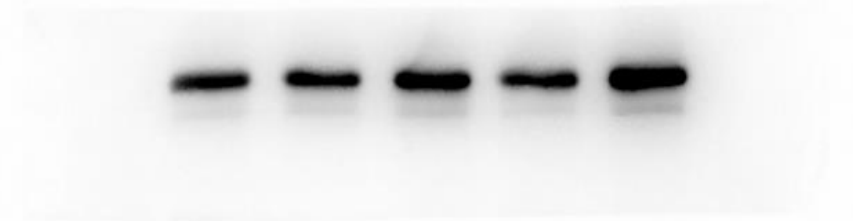

Control  
TGF- $\beta$ 1  
TGF- $\beta$ 1+DMSO  
BEL 60  $\mu$ M  
SB203580

Nucleus-P-NR4A1

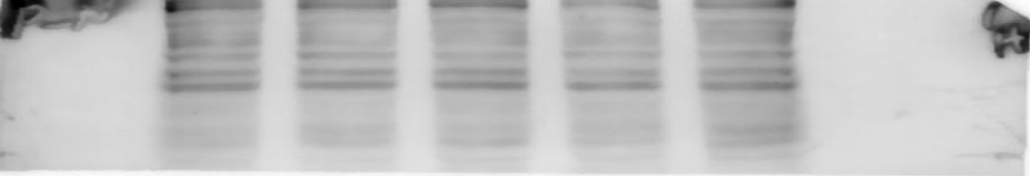

Nucleus-NR4A1

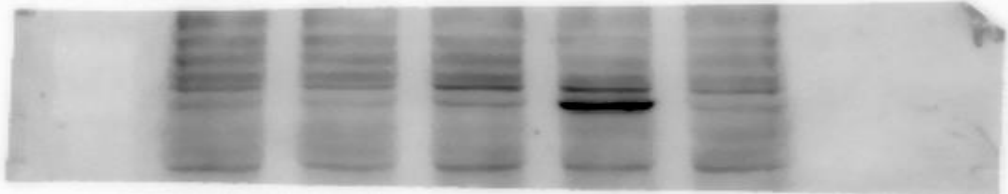

Histone H3

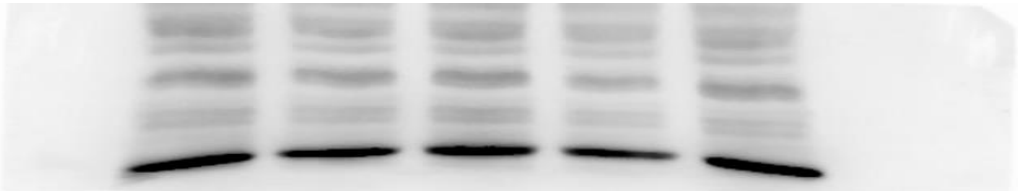

Control  
TGF-β1  
TGF-β1+DMSO  
BEL 60 μM  
SB203580
